# Supplementary material
Source: publisher figshare collection journal article supplement (https://asha.figshare.com/articles/dataset/_/12986036)
Supplement: Supplementary file 1 [file 1]

Supplemental Material S8  
*Statistical Analysis: Cluster Comparison*

| Variable                              | One-way ANOVA after Bonferroni post hoc tests (p-Value) |                                             |                                           |                                          |                                  |                                |                               |                                 |                                |                              |
|---------------------------------------|---------------------------------------------------------|---------------------------------------------|-------------------------------------------|------------------------------------------|----------------------------------|--------------------------------|-------------------------------|---------------------------------|--------------------------------|------------------------------|
|                                       | TLD Cluster <sup>a</sup> vs. SAT-A Cluster <sup>b</sup> | TLD Cluster vs. SAT-RT Cluster <sup>c</sup> | TLD Cluster vs. FORM Cluster <sup>d</sup> | TLD Cluster vs. LEV Cluster <sup>e</sup> | SAT-A Cluster vs. SAT-RT Cluster | SAT-A Cluster vs. FORM Cluster | SAT-A Cluster vs. LEV Cluster | SAT-RT Cluster vs. FORM Cluster | SAT-RT Cluster vs. LEV Cluster | FORM Cluster vs. LEV Cluster |
| Variables used to define the clusters |                                                         |                                             |                                           |                                          |                                  |                                |                               |                                 |                                |                              |
| picture naming                        | .001**                                                  | < .001***                                   | < .001***                                 | < .001***                                | 1.000                            | .009**                         | < .001***                     | .001**                          | < .001***                      | < .001***                    |
| LDT accuracy (acc)                    | 1.000                                                   | < .001***                                   | .317                                      | .001**                                   | < .001***                        | 1.000                          | .007**                        | .001**                          | 1.000                          | .420                         |
| LDT reaction time (rt)                | < .001***                                               | .048*                                       | < .001***                                 | 1.000                                    | < .001***                        | .416                           | .001**                        | < .001***                       | .494                           | < .001***                    |
| RNT acc                               | 1.000                                                   | < .001***                                   | < .001***                                 | .002**                                   | < .001***                        | < .001***                      | .004**                        | .020*                           | 1.000                          | .029*                        |
| RNT rt                                | < .001***                                               | 1.000                                       | .002**                                    | 1.000                                    | < .001***                        | < .001***                      | < .001***                     | .001**                          | 1.000                          | .116                         |
| Other variables                       |                                                         |                                             |                                           |                                          |                                  |                                |                               |                                 |                                |                              |
| word-picture matching                 | 1.000                                                   | .825                                        | .001**                                    | .007**                                   | 1.000                            | .099                           | .163                          | .103                            | .187                           | 1.000                        |
| nonword repetition task               | .779                                                    | .848                                        | < .001***                                 | .116                                     | 1.000                            | .035*                          | 1.000                         | .008**                          | 1.000                          | 1.000                        |

Note. TLD = typical lexical development. SAT – A = speed-accuracy trade-off in favor of accuracy. SAT – RT = speed-accuracy trade-off in favor of reaction time. FORM = word form difficulties. LEV = limited expressive vocabulary. LDT = lexical decision task. RNT = rapid naming task. acc = accuracy. rt = reaction time.

<sup>a</sup>n = 69. <sup>b</sup>n = 26. <sup>c</sup>n = 41. <sup>d</sup>n=17 <sup>e</sup>n = 9

\**p* < .05, \*\**p* < .01, \*\*\**p* < .001
