# Supplementary material
Source: publisher figshare collection journal article supplement (https://asha.figshare.com/articles/dataset/_/12986036)
Supplement: Supplementary file 2 [file 1]

Supplemental Material S5  
Means of age for LDT and RNT

| Variable                | 6 years<br>(n = 43) |                  | 7 years<br>(n = 44) |                  | 8 years<br>(n = 38) |                  | 9 years<br>(n = 39) |                  | One-way<br>ANOVA               |                     |
|-------------------------|---------------------|------------------|---------------------|------------------|---------------------|------------------|---------------------|------------------|--------------------------------|---------------------|
|                         | z-Score<br>M (SD)   | 95%<br>CI        |                                |                     |
| LDT<br>acc <sup>a</sup> | 90,22 (7,56)        | [87.9, 92.55]    | 92,99 (4,18)        | [91.72, 94.26]   | 94,66 (2,68)        | [93.78, 95.54]   | 95,98 (2,67)        | [95.11, 96.84]   | $F[3, 160] =$<br>10,989<br>*** | $\eta^2 =$<br>0,171 |
| LDT rt <sup>b</sup>     | 870,77 (205,86)     | [807.42, 934.13] | 768,75 (215,49)     | [703.24, 834.27] | 681,68 (98,44)      | [649.32, 714.03] | 605,14 (106,06)     | [570.75, 639.52] | $F[3, 160] =$<br>18,799<br>*** | $\eta^2 =$<br>0,261 |
| RNT<br>acc <sup>a</sup> | 78,65 (8,97)        | [75.89, 81.41]   | 81,76 (7,05)        | [79.62, 83.91]   | 81,39 (7,81)        | [78.82, 83.96]   | 86,35 (5,54)        | [84.55, 88.14]   | $F[3, 160] =$<br>7,372<br>***  | $\eta^2 =$<br>0,121 |
| RNT rt <sup>b</sup>     | 564,22 (115,5)      | [528.36, 565.38] | 483,61 (105,9)      | [453.42, 517.81] | 389,38 (68,84)      | [366.75, 412.0]  | 379,64 (91,3)       | [350.05, 409.24] | $F[3, 160] =$<br>32,358<br>*** | $\eta^2 =$<br>0,378 |

Note. LDT = lexical decision task. RNT = rapid naming task. CI = confidence interval.

<sup>a</sup>accuracy in percentages. <sup>b</sup>reaction time in milliseconds.

\* $p < .05$ , \*\* $p < .01$ , \*\*\* $p < .001$
