# Supplementary material
Source: publisher figshare collection journal article supplement (https://asha.figshare.com/articles/dataset/_/12986036)
Supplement: Supplementary file 3 [file 1]

Supplemental Material S1 - *item set of the auditory lexical decision task*

| Item | German real word | English translation | number of phonemes (Duden, 2015) | morphological complexity <sup>a</sup> (Eisenberg, 2013; canoo.net) | syllable structure <sup>b</sup> | number of phonological neighbors (CLEARPOND & childLex) | logarithmized frequency values (childLex) | number of syllables | AoA (unpublished data) <sup>c</sup> | paired pseudoword |
|------|------------------|---------------------|----------------------------------|--------------------------------------------------------------------|---------------------------------|---------------------------------------------------------|-------------------------------------------|---------------------|-------------------------------------|-------------------|
| 1    | Fenster          | <i>window</i>       | 6                                | 1                                                                  | 1                               | 1                                                       | 2,5985                                    | 2                   | 1,86                                | Fenser            |
| 2    | König            | <i>king</i>         | 5                                | 1                                                                  | 0                               | 0                                                       | 2,1962                                    | 2                   | 1,92                                | Sönig             |
| 3    | Sonne            | <i>sun</i>          | 4                                | 1                                                                  | 0                               | 10                                                      | 2,3863                                    | 2                   | 1,38                                | Sowwe             |
| 4    | Onkel            | <i>uncle</i>        | 4                                | 1                                                                  | 1                               | 1                                                       | 2,4974                                    | 2                   | 1,76                                | Ongel             |
| 5    | Prinzessin       | <i>princess</i>     | 10                               | 2                                                                  | 1                               | 0                                                       | 2,0480                                    | 3                   | 2,09                                | Prinzesstin       |
| 6    | Polizei          | <i>police</i>       | 8                                | 2                                                                  | 0                               | 0                                                       | 2,0720                                    | 3                   | 2,01                                | Pozilei           |
| 7    | Zauberer         | <i>wizard</i>       | 8                                | 2                                                                  | 0                               | 2                                                       | 2,1620                                    | 3                   | 2,46                                | Zaumberer         |
| 8    | Dunkelheit       | <i>darkness</i>     | 10                               | 2                                                                  | 1                               | 0                                                       | 2,1400                                    | 3                   | 3,1                                 | Dulkengheit       |
| 9    | Mantel           | <i>coat</i>         | 5                                | 1                                                                  | 1                               | 2                                                       | 1,7331                                    | 2                   | 2,76                                | Namtel            |
| 10   | Geschenk         | <i>gift</i>         | 6                                | 2                                                                  | 1                               | 0                                                       | 1,8682                                    | 2                   | 1,86                                | Gescheck          |
| 11   | Mücke            | <i>mosquito</i>     | 4                                | 1                                                                  | 0                               | 9                                                       | 1,0175                                    | 2                   | 2,34                                | Mückse            |
| 12   | Gespent          | <i>ghost</i>        | 8                                | 1                                                                  | 1                               | 1                                                       | 1,9705                                    | 2                   | 2,35                                | Gespent           |
| 13   | Zuschauer        | <i>audience</i>     | 7                                | 2                                                                  | 0                               | 0                                                       | 1,6139                                    | 3                   | 3,27                                | Zustauer          |
| 14   | Banane           | <i>banana</i>       | 6                                | 1                                                                  | 0                               | 0                                                       | 1,1480                                    | 3                   | 1,56                                | Ranane            |
| 15   | Schmetterling    | <i>butterfly</i>    | 8                                | 2                                                                  | 1                               | 0                                                       | 1,3887                                    | 3                   | 2,21                                | Schmellerting     |
| 16   | Gewitter         | <i>thunderstorm</i> | 6                                | 2                                                                  | 0                               | 2                                                       | 1,3615                                    | 3                   | 2,45                                | Gewiffer          |
| 17   | Hummel           | <i>humble-bee</i>   | 4                                | 1                                                                  | 0                               | 5                                                       | 0,5289                                    | 2                   | 2,21                                | Huggel            |
| 18   | Künstler         | <i>artist</i>       | 7                                | 2                                                                  | 1                               | 0                                                       | 0,8944                                    | 2                   | 3,83                                | Künster           |
| 19   | Mandel           | <i>almond</i>       | 5                                | 1                                                                  | 1                               | 3                                                       | 0,5624                                    | 2                   | 2,74                                | Namdel            |
| 20   | Kreide           | <i>chalk</i>        | 6                                | 1                                                                  | 1                               | 2                                                       | 0,9571                                    | 2                   | 2,36                                | Kreinde           |
| 21   | Rauferei         | <i>scuffle</i>      | 8                                | 2                                                                  | 0                               | 1                                                       | 0,0853                                    | 3                   | 3,87                                | Raufetrei         |
| 22   | Melone           | <i>melon</i>        | 6                                | 1                                                                  | 0                               | 0                                                       | 0,3863                                    | 3                   | 2,59                                | Menole            |
| 23   | Musiker          | <i>musician</i>     | 6                                | 2                                                                  | 0                               | 0                                                       | 0,8386                                    | 3                   | 3,0                                 | Muliker           |
| 24   | Wanderer         | <i>hiker</i>        | 7                                | 2                                                                  | 1                               | 0                                                       | 0,7543                                    | 3                   | 3,36                                | Waderer           |
| 25   | schlafen         | <i>to sleep</i>     | 5                                | 1                                                                  | 1                               | 2                                                       | 2,5050                                    | 2                   | 1,42                                | schlamfen         |
| 26   | kichern          | <i>to giggle</i>    | 5                                | 1                                                                  | 0                               | 3                                                       | 2,1837                                    | 2                   | 3,24                                | kichpern          |
| 27   | rutschen         | <i>to slide</i>     | 5                                | 1                                                                  | 0                               | 5                                                       | 2,0275                                    | 2                   | 1,81                                | ruschten          |
| 28   | schleichen       | <i>to sneak</i>     | 6                                | 1                                                                  | 1                               | 2                                                       | 2,1468                                    | 2                   | 2,59                                | schleiken         |
| 29   | erzählen         | <i>to tell</i>      | 8                                | 2                                                                  | 0                               | 2                                                       | 2,8437                                    | 3                   | 2,15                                | erlähzen          |
| 30   | verstecken       | <i>to hide</i>      | 8                                | 2                                                                  | 1                               | 1                                                       | 2,3216                                    | 3                   | 2,03                                | vertecken         |
| 31   | besuchen         | <i>to visit</i>     | 6                                | 2                                                                  | 0                               | 0                                                       | 2,0715                                    | 3                   | 2,2                                 | bemuchen          |
| 32   | erschrecken      | <i>to shock</i>     | 7                                | 2                                                                  | 1                               | 0                                                       | 2,3615                                    | 3                   | 2,46                                | erschecken        |
| 33   | kitzeln          | <i>to tickle</i>    | 6                                | 1                                                                  | 1                               | 2                                                       | 1,4120                                    | 2                   | 2,12                                | schitzeln         |
| 34   | summen           | <i>to hum</i>       | 5                                | 1                                                                  | 0                               | 3                                                       | 1,4277                                    | 2                   | 2,35                                | sumpen            |
| 35   | löschen          | <i>to delete</i>    | 4                                | 1                                                                  | 0                               | 2                                                       | 1,4813                                    | 2                   | 2,84                                | lösckhen          |

|    |              |                          |    |   |   |   |        |   |      |             |
|----|--------------|--------------------------|----|---|---|---|--------|---|------|-------------|
| 36 | klingeln     | <i>to jingle</i>         | 6  | 2 | 1 | 1 | 1,9351 | 2 | 2,04 | flingeln    |
| 37 | frühstücken  | <i>to have breakfast</i> | 8  | 2 | 1 | 0 | 1,2549 | 3 | 2,27 | frühtücken  |
| 38 | spazieren    | <i>to stroll</i>         | 9  | 1 | 1 | 0 | 1,6561 | 3 | 2,47 | spariezen   |
| 39 | bezahlen     | <i>to pay</i>            | 8  | 2 | 0 | 2 | 1,8256 | 3 | 2,62 | belahzen    |
| 40 | verletzen    | <i>to injure</i>         | 8  | 2 | 0 | 2 | 1,7198 | 3 | 2,88 | verlessen   |
| 41 | würfeln      | <i>to dice</i>           | 6  | 2 | 1 | 0 | 0,4735 | 2 | 2,33 | gürfeln     |
| 42 | föhnen       | <i>to blow dry</i>       | 5  | 1 | 0 | 4 | 0,0342 | 2 | 2,61 | föhnsen     |
| 43 | schrubben    | <i>to scrub</i>          | 5  | 1 | 1 | 2 | 0,8470 | 2 | 3,25 | schrumben   |
| 44 | hupen        | <i>to hoot</i>           | 4  | 1 | 0 | 5 | 0,7108 | 2 | 2,19 | huschen     |
| 45 | trompeten    | <i>to trumpet</i>        | 8  | 1 | 1 | 0 | 0,7645 | 3 | 3,0  | trometen    |
| 46 | reinigen     | <i>to clean</i>          | 7  | 2 | 0 | 3 | 0,9092 | 3 | 3,72 | reiginen    |
| 47 | verschnaufen | <i>to take breath</i>    | 10 | 2 | 1 | 0 | 0,8212 | 3 | 3,66 | verschaufen |
| 48 | zerreiben    | <i>to grind</i>          | 9  | 2 | 0 | 1 | 0,2103 | 3 | 3,72 | zerbeiren   |

Note. AoA = Age of Acquisition

<sup>a</sup>1 = mono-morphemic, 2 = poly-morphemic. <sup>b</sup>0 = no consonant cluster, 1 = consonant cluster. <sup>c</sup>7-Point Likert Scale (1=AoA of 0-2 years, 2=AoA of 3-4 years, 3=AoA of 5-6 years, 4=AoA of 7-8 years, 5=AoA of 9-10 years, 6=AoA of 11-12 years, 7=AoA of 13+ years).
