# Supplementary material
Source: publisher figshare collection journal article supplement (https://asha.figshare.com/articles/dataset/_/12986036)
Supplement: Supplementary file 4 [file 1]

Supplemental Material S3 - *Item set of the rapid naming task*

| Item | Subset                                    | German real word | English translation | number of phonemes (Duden, 2015) | morphological complexity <sup>a</sup> (Eisenberg, 2013; canoo.net) | syllable structure <sup>b</sup> | number of phonological neighbors (CLEARPOND & childLex) | logarithmized frequency values (childLex) | number of syllables | AoA (unpublished data) <sup>c</sup> |
|------|-------------------------------------------|------------------|---------------------|----------------------------------|--------------------------------------------------------------------|---------------------------------|---------------------------------------------------------|-------------------------------------------|---------------------|-------------------------------------|
| 1    | subset 1<br>(body parts, nouns)           | Auge             | <i>eye</i>          | 4                                | 1                                                                  | 0                               | 0                                                       | 3,1517                                    | 2                   | 1,55                                |
| 2    |                                           | Nase             | <i>nose</i>         | 4                                | 1                                                                  | 0                               | 9                                                       | 2,5249                                    | 2                   | 1,38                                |
| 3    |                                           | Schulter         | <i>shoulder</i>     | 5                                | 1                                                                  | 1                               | 1                                                       | 2,6512                                    | 2                   | 2,58                                |
| 4    |                                           | Zunge            | <i>tongue</i>       | 5                                | 1                                                                  | 0                               | 3                                                       | 1,9303                                    | 2                   | 2,08                                |
| 5    |                                           | Rücken           | <i>back</i>         | 4                                | 1                                                                  | 0                               | 8                                                       | 2,4530                                    | 2                   | 2,31                                |
| 6    |                                           | Finger           | <i>finger</i>       | 4                                | 1                                                                  | 0                               | 6                                                       | 2,4935                                    | 2                   | 1,69                                |
| 7    | subset 2<br>(animals, nouns)              | Spinne           | <i>spider</i>       | 5                                | 1                                                                  | 1                               | 4                                                       | 1,7153                                    | 2                   | 1,93                                |
| 8    |                                           | Schnecke         | <i>snail</i>        | 5                                | 1                                                                  | 1                               | 3                                                       | 1,2771                                    | 2                   | 1,89                                |
| 9    |                                           | Hamster          | <i>hamster</i>      | 6                                | 1                                                                  | 1                               | 0                                                       | 1,7774                                    | 2                   | 2,39                                |
| 10   |                                           | Ziege            | <i>goat</i>         | 5                                | 1                                                                  | 0                               | 9                                                       | 1,4908                                    | 2                   | 1,91                                |
| 11   |                                           | Löwe             | <i>lion</i>         | 4                                | 1                                                                  | 0                               | 2                                                       | 1,5904                                    | 2                   | 1,73                                |
| 12   |                                           | Esel             | <i>donkey</i>       | 3                                | 1                                                                  | 0                               | 2                                                       | 1,2645                                    | 2                   | 1,77                                |
| 13   | subset 3<br>(movements, verbs)            | klettern         | <i>to climb</i>     | 6                                | 1                                                                  | 1                               | 1                                                       | 2,3188                                    | 2                   | 2,15                                |
| 14   |                                           | tanzen           | <i>to dance</i>     | 6                                | 1                                                                  | 1                               | 5                                                       | 2,0379                                    | 2                   | 1,94                                |
| 15   |                                           | kriechen         | <i>to creep</i>     | 5                                | 1                                                                  | 1                               | 3                                                       | 2,0112                                    | 2                   | 2,73                                |
| 16   |                                           | fahren           | <i>to drive</i>     | 5                                | 1                                                                  | 0                               | 12                                                      | 2,8678                                    | 2                   | 1,56                                |
| 17   |                                           | gehen            | <i>to go</i>        | 4                                | 1                                                                  | 0                               | 5                                                       | 3,4492                                    | 2                   | 1,52                                |
| 18   |                                           | tauchen          | <i>to dive</i>      | 5                                | 1                                                                  | 0                               | 7                                                       | 2,2562                                    | 2                   | 2,68                                |
| 19   | subset 4<br>(childlike activities, verbs) | kneten           | <i>to knead</i>     | 5                                | 1                                                                  | 1                               | 1                                                       | 1,2244                                    | 2                   | 1,97                                |
| 20   |                                           | singen           | <i>to sing</i>      | 5                                | 1                                                                  | 0                               | 8                                                       | 2,2191                                    | 2                   | 1,64                                |
| 21   |                                           | schaukeln        | <i>to swing</i>     | 6                                | 1                                                                  | 1                               | 1                                                       | 1,4774                                    | 2                   | 1,88                                |
| 22   |                                           | malen            | <i>to paint</i>     | 5                                | 1                                                                  | 0                               | 9                                                       | 1,9199                                    | 2                   | 1,43                                |
| 23   |                                           | wippen           | <i>to seesaw</i>    | 4                                | 1                                                                  | 0                               | 6                                                       | 1,1353                                    | 2                   | 1,99                                |
| 24   |                                           | mischen          | <i>to mingle</i>    | 4                                | 1                                                                  | 0                               | 6                                                       | 1,7276                                    | 2                   | 2,19                                |
| 25   | subset 5<br>(animals, nouns and verbs)    | Katze            | <i>cat</i>          | 5                                | 1                                                                  | 0                               | 7                                                       | 2,4484                                    | 2                   | 1,5                                 |
| 26   |                                           | Schlange         | <i>snake</i>        | 5                                | 1                                                                  | 1                               | 4                                                       | 2,0480                                    | 2                   | 2,06                                |
| 27   |                                           | Vogel            | <i>bird</i>         | 4                                | 1                                                                  | 0                               | 0                                                       | 1,9859                                    | 2                   | 1,46                                |
| 28   |                                           | trinken          | <i>to drink</i>     | 6                                | 1                                                                  | 1                               | 1                                                       | 2,2581                                    | 2                   | 1,27                                |
| 29   |                                           | fressen          | <i>to eat</i>       | 5                                | 1                                                                  | 1                               | 2                                                       | 2,0501                                    | 2                   | 2,35                                |
| 30   |                                           | fliegen          | <i>to fly</i>       | 5                                | 1                                                                  | 1                               | 4                                                       | 2,5451                                    | 2                   | 1,86                                |
| 31   | subset 6<br>(food, nouns and verbs)       | Apfel            | <i>apple</i>        | 4                                | 1                                                                  | 0                               | 1                                                       | 1,7900                                    | 2                   | 1,55                                |
| 32   |                                           | Zwiebel          | <i>onion</i>        | 4                                | 1                                                                  | 0                               | 2                                                       | 1,4470                                    | 2                   | 2,3                                 |
| 33   |                                           | Käse             | <i>cheese</i>       | 6                                | 1                                                                  | 1                               | 0                                                       | 1,1802                                    | 2                   | 1,85                                |
| 34   |                                           | schneiden        | <i>to cut</i>       | 6                                | 1                                                                  | 1                               | 1                                                       | 1,8386                                    | 2                   | 2,13                                |
| 35   |                                           | kochen           | <i>to cook</i>      | 4                                | 1                                                                  | 0                               | 7                                                       | 1,9365                                    | 2                   | 1,82                                |
| 36   |                                           | schälen          | <i>to peel</i>      | 5                                | 1                                                                  | 0                               | 6                                                       | 1,0287                                    | 2                   | 2,46                                |

Note. AoA = Age of Acquisition

<sup>a</sup>1 = mono-morphemic, 2 = poly-morphemic. <sup>b</sup>0 = no consonant cluster, 1 = consonant cluster. <sup>c</sup>7-Point Likert Scale (1=AoA of 0-2 years, 2=AoA of 3-4 years, 3=AoA of 5-6 years, 4=AoA of 7-8 years, 5=AoA of 9-10 years, 6=AoA of 11-12 years, 7=AoA of 13+ years).
