# Supplementary material
Source: publisher figshare collection journal article supplement (https://asha.figshare.com/articles/dataset/_/12986036)
Supplement: Supplementary file 5 [file 1]

Supplemental Material S7

Scores on lexical tasks of clusters and one-way ANOVA

| Variable                              | TLD Cluster<br>(n = 69) |              | SAT-A Cluster<br>(n = 26) |               | SAT-RT Cluster<br>(n = 41) |                | FORM Cluster<br>(n = 17) |                | LEV Cluster<br>(n = 9) |                | One-way ANOVA                                            |
|---------------------------------------|-------------------------|--------------|---------------------------|---------------|----------------------------|----------------|--------------------------|----------------|------------------------|----------------|----------------------------------------------------------|
|                                       | z-Score<br>M (SD)       | 95% CI       | z-Score<br>M (SD)         | 95% CI        | z-Score<br>M (SD)          | 95% CI         | z-Score<br>M (SD)        | 95% CI         | z-Score<br>M (SD)      | 95% CI         |                                                          |
| Variables used to define the clusters |                         |              |                           |               |                            |                |                          |                |                        |                |                                                          |
| Picture naming                        | 0,47 (0,68)             | [0,31, 0,63] | - 0,21 (0,87)             | [-0,56, 0,14] | - 0,15 (0,75)              | [-0,39, 0,88]  | - 0,99 (0,69)            | [-1,35, -0,64] | - 3,01 (0,74)          | [-3,59, -2,44] | F[4, 157] = 51,961<br>p < .001<br>η <sup>2</sup> = 0,570 |
| LDT acc                               | 0,47 (0,6)              | [0,33, 0,61] | 4,1 (0,68)                | [0,13, 0,68]  | - 0,75 (0,88)              | [-1,03, -0,47] | 0,05 (0,49)              | [-0,2, 0,3]    | - 0,54 (0,98)          | [-1,3 -0,21]   | F[4, 157] = 22,467<br>p < .001<br>η <sup>2</sup> = 0,364 |
| LDT rt                                | 0,29 (0,77)             | [0,11, 0,48] | - 0,87 (0,57)             | [-1,1, -0,64] | 0,68 (0,62)                | [0,48, 0,88]   | - 1,31 (0,71)            | [-1,67, -0,95] | 0,18 (0,48)            | [-0,19, 0,54]  | F[4, 157] = 38,886<br>p < .001<br>η <sup>2</sup> = 0,498 |
| RNT acc                               | 0,55 (0,59)             | [0,41, 0,69] | 0,61 (0,7)                | [0,32, 0,89]  | - 0,63 (0,89)              | [-0,91, -0,35] | - 1,28 (0,77)            | [-1,67, -0,88] | - 0,39 (0,54)          | [-0,81, 0,02]  | F[4, 157] = 37,741<br>p < .001<br>η <sup>2</sup> = 0,490 |
| RNT rt                                | 0,36 (0,67)             | [0,2, 0,52]  | - 1,47 (0,67)             | [-1,74, -1,2] | 0,46 (0,71)                | [0,24, 0,69]   | - 0,34 (0,69)            | [-0,69, 0,01]  | 0,38 (0,7)             | [-0,16, 0,91]  | F[4, 157] = 41,329<br>p < .001<br>η <sup>2</sup> = 0,513 |
| Other variables                       |                         |              |                           |               |                            |                |                          |                |                        |                |                                                          |
| word-picture matching                 | 1,22 (1,66)             | [0,83, 1,63] | 0,76 (1,78)               | [0,04, 1,48]  | 0,65 (1,71)                | [0,11, 1,19]   | - 0,6 (1,44)             | [-1,34, 0,14]  | - 0,81 (1,71)          | [-2,13, 0,5]   | F[4, 157] = 6,148<br>p < .001<br>η <sup>2</sup> = 0,135  |
| nonword repetition task               | 0,32 (0,78)             | [0,13, 0,51] | -0,06 (0,89)              | [-0,42, 0,3]  | 0,00 (1,19)                | [-1,53, -0,31] | -0,92 (1,19)             | [-1,53, -0,31] | -0,52 (1,32)           | [-0,15, 0,16]  | F[4, 157] = 6,929<br>p < .001<br>η <sup>2</sup> = 0,150  |

Note. TLD = typical lexical development. SAT – A = speed-accuracy trade-off in favor of accuracy. SAT – RT = speed-accuracy trade-off in favor of reaction time. FORM = word form difficulties. LEV = limited expressive vocabulary. CI = confidence interval. LDT = lexical decision task. RNT = rapid naming task. acc = accuracy. rt = reaction time.

\*p < .05, \*\*p < .01, \*\*\*p < .001
