# Supplementary material
Source: publisher figshare collection journal article supplement (https://asha.figshare.com/articles/dataset/_/12986036)
Supplement: Supplementary file 6 [file 1]

## Supplemental Material S2

*Lexical decision task: descriptive statistic for selected nouns and verbs matched for frequency, word length (number of phonemes), neighborhood density, AoA, mean duration, and mean pitch of recorded word stimuli*

|                  | Logarithmized<br>frequency value                    | Word length                                         | Neighborhood density                                | Rated AoA <sup>ab</sup>                             | Mean duration of<br>recorded stimuli <sup>c</sup>    | Mean pitch of<br>recorded stimuli <sup>d</sup>       |
|------------------|-----------------------------------------------------|-----------------------------------------------------|-----------------------------------------------------|-----------------------------------------------------|------------------------------------------------------|------------------------------------------------------|
| Nouns            | 1,47                                                | 6,42                                                | 1,63                                                | 2,52                                                | 0,69                                                 | 171,01                                               |
| Verbs            | 1,50                                                | 6,58                                                | 1,75                                                | 2,59                                                | 0,75                                                 | 174,85                                               |
| One-way<br>ANOVA | $F(1, 46) = .020$<br>$p = .888$<br>$\eta^2 = 0,000$ | $F(1, 46) = .113$<br>$p = .738$<br>$\eta^2 = 0,002$ | $F(1, 46) = .038$<br>$p = .846$<br>$\eta^2 = 0,001$ | $F(1, 46) = .168$<br>$p = .684$<br>$\eta^2 = 0,004$ | $F(1, 46) = 2.904$<br>$p = .095$<br>$\eta^2 = 0,059$ | $F(1, 46) = 1.893$<br>$p = .176$<br>$\eta^2 = 0,040$ |

Note. AoA =Age of Acquisition.

<sup>a</sup>Unpublished data. <sup>b</sup>7-Point Likert Scale (1=AoA of 0-2 years, 2=AoA of 3-4 years, 3=AoA of 5-6 years, 4=AoA of 7-8 years, 5=AoA of 9-10 years, 6=AoA of 11-12 years, 7=AoA of 13+ years). <sup>c</sup>Seconds. <sup>d</sup>Hz.

\* $p < .05$ , \*\* $p < .01$ , \*\*\* $p < .001$
