# Supplementary material
Source: publisher figshare collection journal article supplement (https://asha.figshare.com/articles/dataset/_/12986036)
Supplement: Supplementary file 7 [file 1]

Supplemental Material S4

*Rapid naming task: descriptive statistic for selected nouns and verbs matched for frequency, word length (number of phonemes), Neighborhood density, AoA<sup>a</sup>, complexity of syllable structure (words with [1] or without consonant cluster [0])*

|                    | Logarithmized frequency value | Word length | Neighborhood density <sup>b</sup> | Rated AoA <sup>c</sup> | Syllable structure |
|--------------------|-------------------------------|-------------|-----------------------------------|------------------------|--------------------|
| Nouns <sup>a</sup> | 1,86                          | 4,50        | 2,50                              | 1,89                   | 0,00               |
| Verbs <sup>a</sup> | 2,02                          | 5,00        | 5,00                              | 2,06                   | 0,50               |
| Mann-Whitney U     | 151.0                         | 106.5       | 123.5                             | 135.0                  | 135.0              |
| p                  | .728                          | .060        | .220                              | .393                   | .317               |

Note. AoA = Age of Acquisition.

<sup>a</sup>Mean value. <sup>b</sup>Values for neighborhood density were taken from clearpond and childLex database. <sup>c</sup>Unpublished data.

\* $p < .05$ , \*\* $p < .01$ , \*\*\* $p < .001$
