# Supplementary material
Source: publisher figshare collection journal article supplement (https://asha.figshare.com/articles/dataset/_/12986036)
Supplement: Supplementary file 8 [file 1]

Supplemental Material S6

*Statistical Analysis: Comparison of Age Groups*

One-way ANOVA after Bonferroni post hoc tests (p-Value)

| Variable             | 6 years <sup>a</sup> vs.<br>7 years <sup>b</sup> | 6 years vs.<br>8 years <sup>c</sup> | 6 years vs.<br>9 years <sup>d</sup> | 7 years vs.<br>8 years <sup>e</sup> | 7 years vs.<br>9 years | 8 years vs.<br>9 years |
|----------------------|--------------------------------------------------|-------------------------------------|-------------------------------------|-------------------------------------|------------------------|------------------------|
| LDT acc <sup>e</sup> | .048*                                            | < .001***                           | < .001***                           | .709                                | .032*                  | 1.000                  |
| LDT rt <sup>f</sup>  | .033*                                            | < .001***                           | < .001***                           | .127                                | < .001***              | .291                   |
| RNT acc <sup>e</sup> | .324                                             | .611                                | < .001***                           | 1.000                               | .036*                  | .025*                  |
| RNT rt <sup>f</sup>  | .002**                                           | < .001***                           | < .001***                           | < .001***                           | < .001***              | 1.000                  |

Note. LDT = lexical decision task. RNT = rapid naming task.

<sup>a</sup>*n* = 43. <sup>b</sup>*n* = 44. <sup>c</sup>*n* = 38. <sup>d</sup>*n* = 39. <sup>e</sup>accuracy in percentages. <sup>f</sup>reaction time in milliseconds

\**p* < .05, \*\**p* < .01, \*\*\**p* < .001
